# Supplementary material
Source: Research Square preprint supplement (doi:10.21203/rs.3.rs-8733111/v1)

**A novel S100A-TLR3-IFIT3 signaling axis promotes cardiomyocyte apoptosis  
during myocardial infarction**

Cheng Chen<sup>1,2</sup>, Haoqiang Chen<sup>3</sup>, Zhicheng He<sup>2</sup>, Yuanzhi Chen<sup>2,6</sup>, Hong Zhang<sup>3</sup>, Wenyong Xiong<sup>4</sup>,  
#, Yingying He<sup>5, #</sup>, Shubai Liu<sup>2, #</sup>

<sup>1</sup> Department of Clinical Pharmacy, The First People's Hospital of Yunnan Province, The Affiliated Hospital of Kunming University of Science and Technology, Kunming, 650032, China<sup>2</sup> State Key Laboratory of Phytochemistry and Plant Resources in West China, Kunming Institute of Botany, Chinese Academy of Sciences, Kunming, 650201, China.

<sup>3</sup> Department of Cardiovascular Medicine, The First People's Hospital of Yunnan Province, The Affiliated Hospital of Kunming University of Science and Technology, Kunming, 650032, China.

<sup>4</sup> Key Laboratory of Medicinal Chemistry for Natural Resource, Ministry of Education; Yunnan Provincial Center for Research & Development of Natural Products; School of Pharmacy, Yunnan University, Kunming 650500, PR China.

<sup>5</sup> School of Chemical Science & Technology, Yunnan University, Kunming, 650091, China.

<sup>6</sup> College of Life Science, Anqing Normal University, Anqing, 246133, China.

**# Correspondence to:**

**Dr. Shubai Liu,**

Mailing address: State Key Laboratory of Phytochemistry and Plant Resources in West China, Kunming Institute of Botany, Chinese Academy of Sciences, 132 Blue Black

Street, Kunming, Yunnan 650201, China; Phone: (86)871-65223309

E-mail: [liushubai@mail.kib.ac.cn](mailto:liushubai@mail.kib.ac.cn)

### **Figure Legend**

**Supplement Figure 1. a.** LVPWd: LV posterior wall thickness in diastole. **b.** LVPWs: LV posterior wall thickness in systole. **c.** The statistical results of IFIT3 expression in the infarcted area of the left ventricle of rats. Data were represented as mean±SEM, unpaired t-test, compared to the sham group, n=6.

**Supplement Figure 2.** Western blot analysis the expression levels of IFIT3 (**a**), CASP3 (**b**), Cleaved CASP3 (**c**) and Cleaved CASP3/CASP3 (**d**). These data were represented as mean±SEM, unpaired t-test, n=4, compared to the rest group. **e.** AC-16 apoptosis induced by persistent oxygen-glucose deprivation for 2h. The apoptosis was detected by flow cytometry and about 20,000 cells were detected (**e**). (**f**) The analysis revealed significant changes in gene expression in the IFIT3 knockout AC-16 cells following 2 hours of persistent OGD. Genes upregulated are indicated in red, downregulated genes in blue, and genes without statistically significant differences in gray (n=3). Significant genes are fold change over 2. All results were used t-test and expressed mean±SEM, compared with the control group (WT), n=3. (**g**) GSEA indicated that the Hallmark apoptosis pathway was significantly enriched.

**Supplement Figure 3.** Apoptosis induced by carbonyl cyanide m-chlorophenyl hydrazone (CCCP) was investigated in IFIT3 knockout cardiomyocytes. Compared to

the wild-type (WT) control group, the knockout of IFIT3 significantly reduced cardiomyocyte apoptosis induced by CCCP at concentrations of 2.5  $\mu$ M and 5.0  $\mu$ M. **(a)** Apoptosis induced by CCCP at 2.5  $\mu$ M was measured using flow cytometry. **(b)** Apoptosis induced by CCCP at 5.0  $\mu$ M was also assessed via flow cytometry. Approximately 10,000 cells were analyzed in each experiment. All results were statistically analyzed using a t-test and are expressed as the mean  $\pm$  standard error of the mean (SEM), with comparisons made to the wild-type group (n=3).

**Supplement Figure 4. a.** The ratio of Cleaved caspase3/caspase 3 at overexpression IFIT3 48h. All results were statistically analyzed using a t-test and are expressed as the mean  $\pm$  standard error of the mean (SEM), with comparisons made to the pc 3.1 DNA-vector (n=3). **b.** The ratio of Cleaved caspase8/caspase 8 at overexpression IFIT3 48h. the result was statistically analyzed using a t-test and are expressed as the mean  $\pm$  standard error of the mean (SEM), with comparisons made to the pc 3.1 DNA-vector group (n=3). **c.** The ratio of Cleaved caspase9/caspase 9 at overexpression IFIT3 48h. The result was statistically analyzed using a t-test and are expressed as the mean  $\pm$  standard error of the mean (SEM), with comparisons made to the pc 3.1 DNA-vector group (n=3).

**Supplement Figure 5. Interferons induce the IFIT3 expression. a.** Western blot analysis detected IFIT3 expression in AC-16 cells following induction with type I

interferons, specifically IFN- $\alpha$ -1b, IFN- $\alpha$ -2a, and IFN- $\alpha$ -2b (10,000 IU/L) for 24 hours, with n=3. **b.** The detection and quantification of IFIT3 expression induced by IFN- $\alpha$ -1b at concentrations of 100, 1,000, and 10,000 IU/L were performed in HL-1 cells, with n=3. **c.** Western blot analysis detected IFIT3 expression in HL-1 cells following induction with IFN- $\alpha$ -2b at concentrations of 100, 1,000, and 10,000 IU/L for 24 hours, with n=3. **d.** The expression level of IFIT3 in HEK293 cells was detected and quantified after induction with IFN- $\alpha$ -1b, IFN- $\alpha$ -2a, and IFN- $\alpha$ -2b (10,000 IU/L) for 24 hours, with n=3. **e.** Whole transcriptome analysis of IFN mRNA expression was conducted following 2 hours of glucose and oxygen deprivation. At this time point, no significant differences were observed in the mRNA expression of all interferons (n=3). All results were analyzed using the t-test and are presented as mean  $\pm$  SEM, compared to the control group (Ctrl).

**Supplement Figure 6. S100 family proteins induced IFIT3 overexpression in mouse cardiac fibroblasts and HEK293.** **a.** The expression levels of IFIT3 induced by S100 proteins (2.0  $\mu$ g/mL: S100A1, S100A6, S100A8, S100A9, and S100B) were detected and quantified in MCFs after 24 hours (n=6). **b.** The expression levels of IFIT3 induced by S100 proteins (2.0  $\mu$ g/mL: S100A1, S100A6, S100A8, S100A9, and S100B) were also detected and quantified in HEK293 cells after 24 hours (n=4). **c-n.** The quantitative analysis of TLR3/4 signaling pathway activation in AC-16 cells following the induction of S100A1 (c-n) and S100A9 (i-n) (2.0  $\mu$ g/mL, for 2 to 24 hours). All results were analyzed using the t-test and are presented as mean  $\pm$  SEM, compared to

the control group (Ctrl), n=3 or n=4. Statistical significance is indicated as follows: \* p < 0.05; \*\* p < 0.01, \*\*\*\* p < 0.0001.

**Supplement Figure 7.** S100A1 and S100A9 stimulated IFIT3 overexpression and induced AC-16 cells apoptosis. **a-d.** Western blot analysis was conducted to quantitatively assess the expression levels of CASP3 (**a**) and Cleaved-CASP3 (**b**) in AC-16 cells treated with S100A1 (2.0 µg /mL, panels **a, b**) or S100A9 (2.0 µg/mL, panels **c, d**). **e-j.** The effect of IFIT3 knockout on the expression of CASP3 and Cleaved-CASP3 induced by S100A1 (panels **e-g**) and S100A9 (panels **h-j**) was evaluated. Statistical analyses were performed using a t-test or ANOVA test, and results were expressed as mean ± SEM (n>3). Significance was determined at \* p < 0.05; \*\* p < 0.01, \*\*\*\* p < 0.0001 compared with the control group (Ctrl).

S.Figure 1

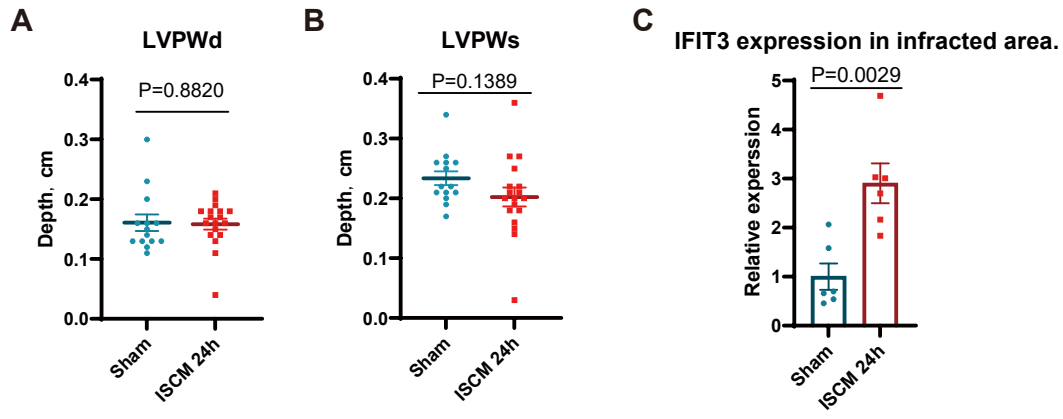

S.Figure 2

A

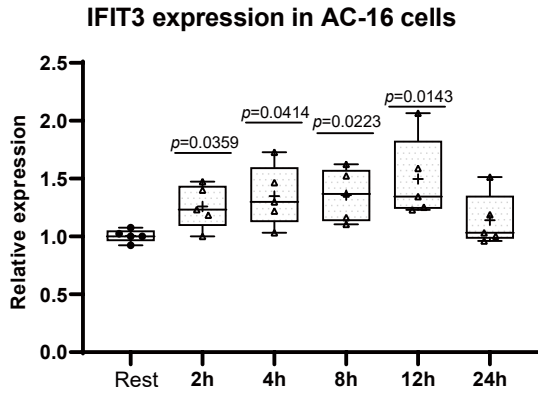

B

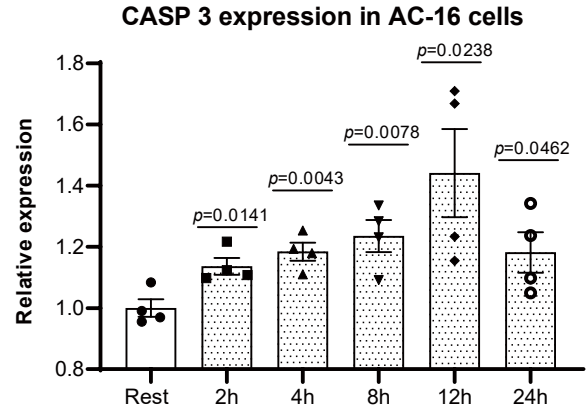

C

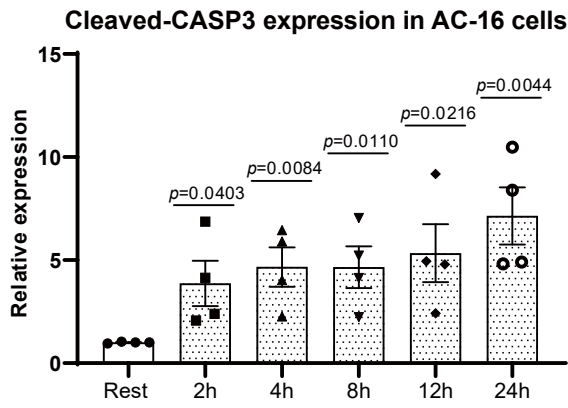

D

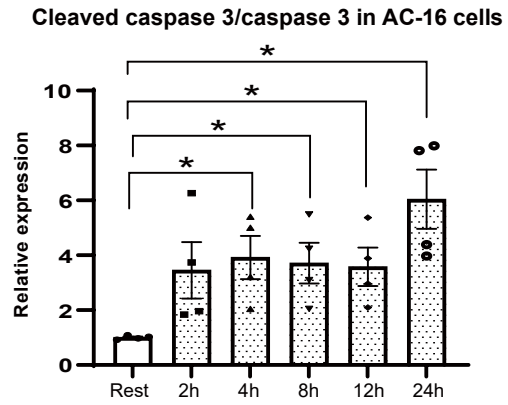

E

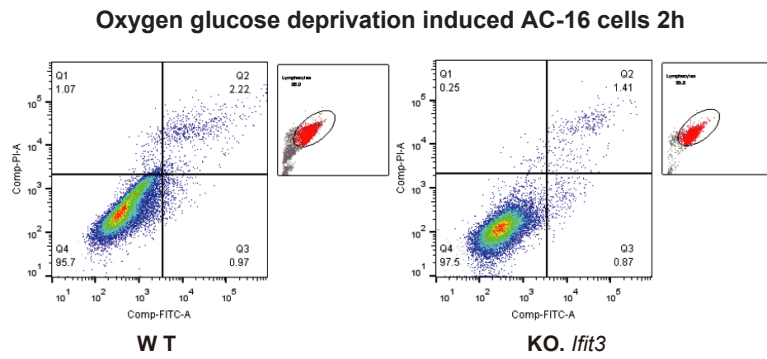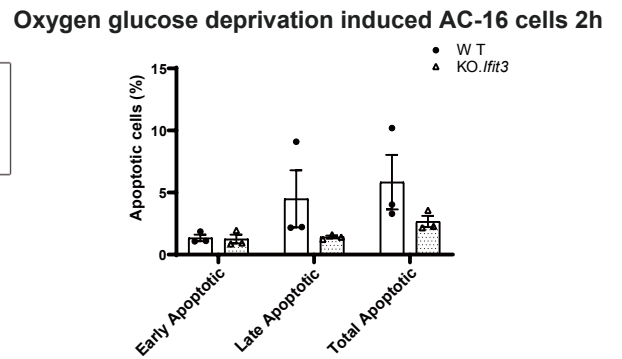

F

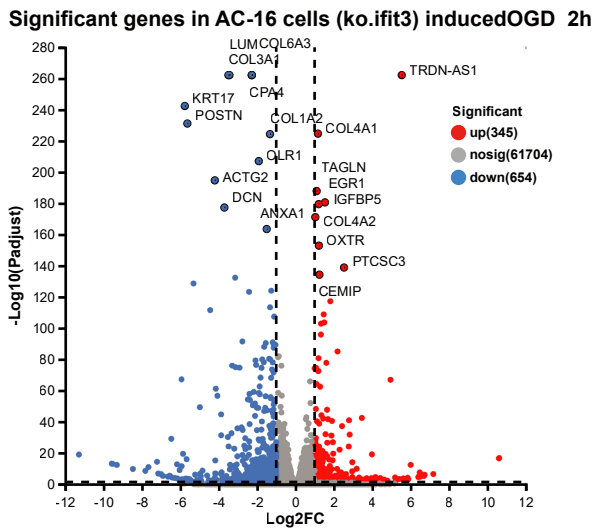

G

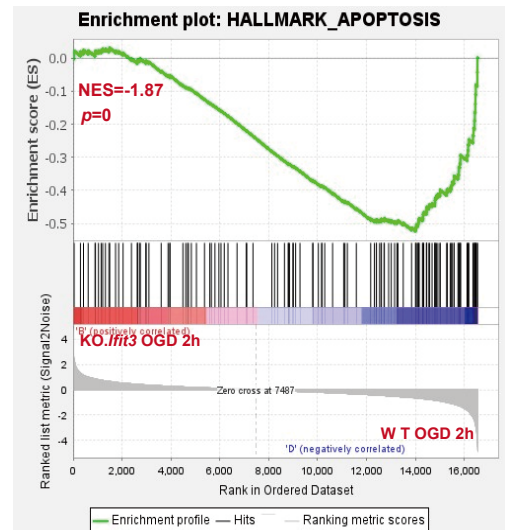

S Figure 3

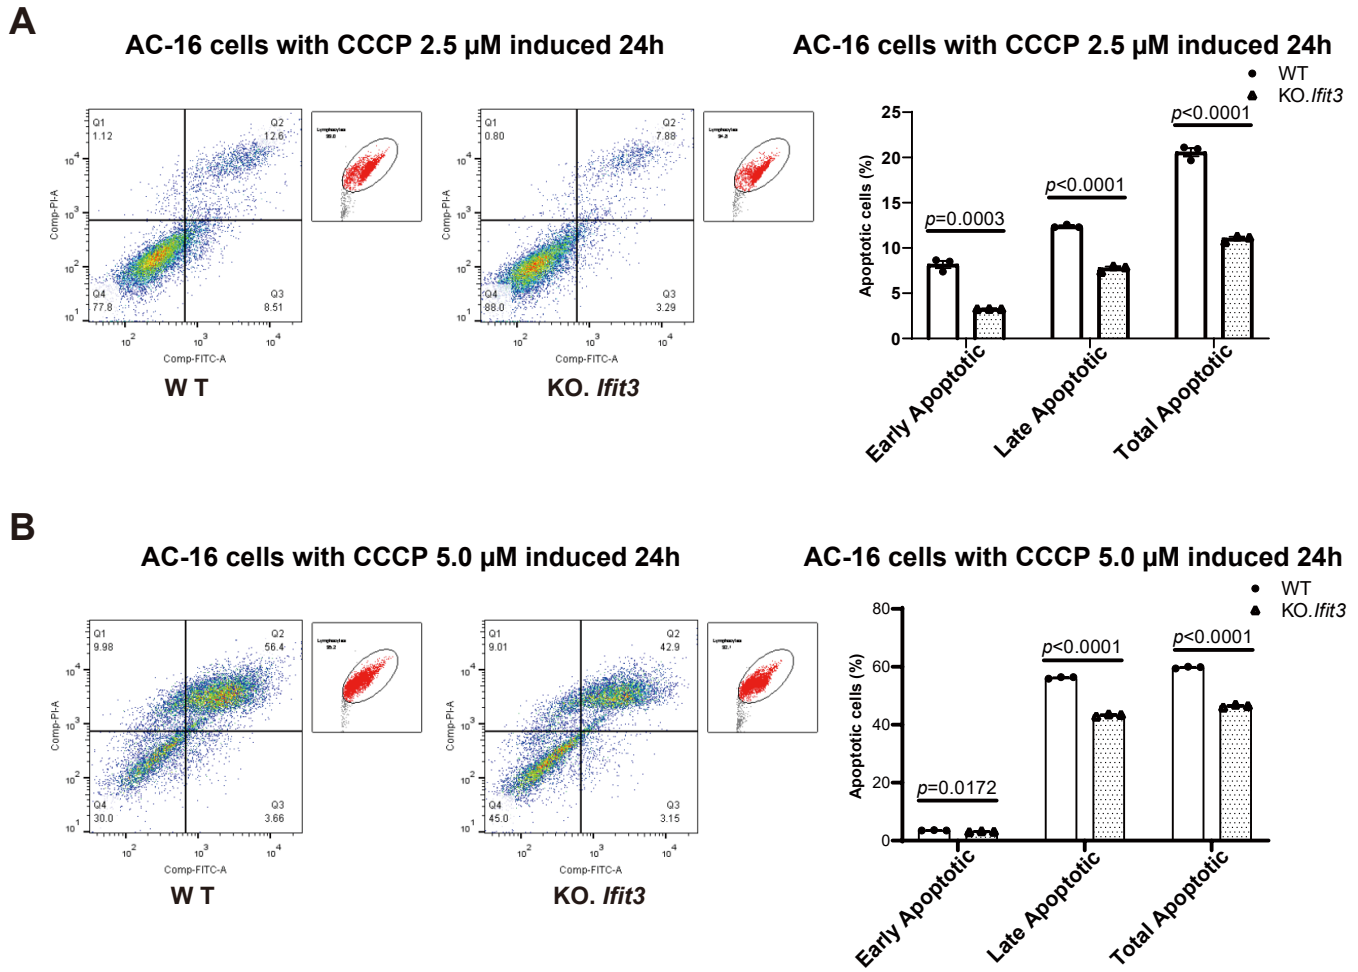

S. Figure 4

**A**

**Cleaved caspase3/caspase 3**

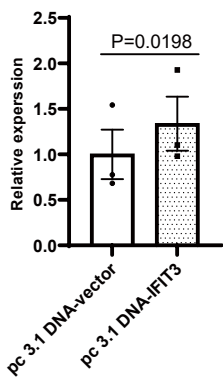

**B**

**Cleaved caspase8/caspase 8**

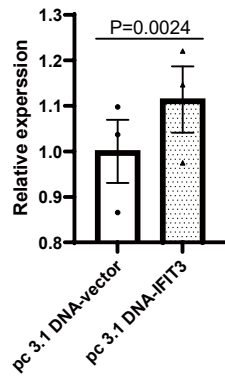

**Cleaved caspase8/caspase 8**

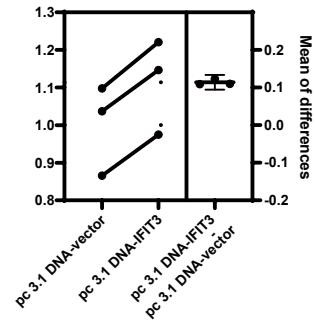

**C**

**Cleaved caspase9/caspase 9**

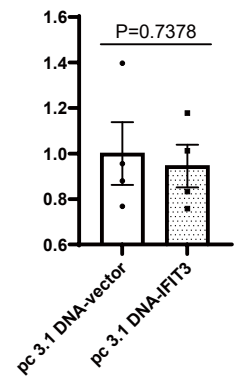

S Figure 5

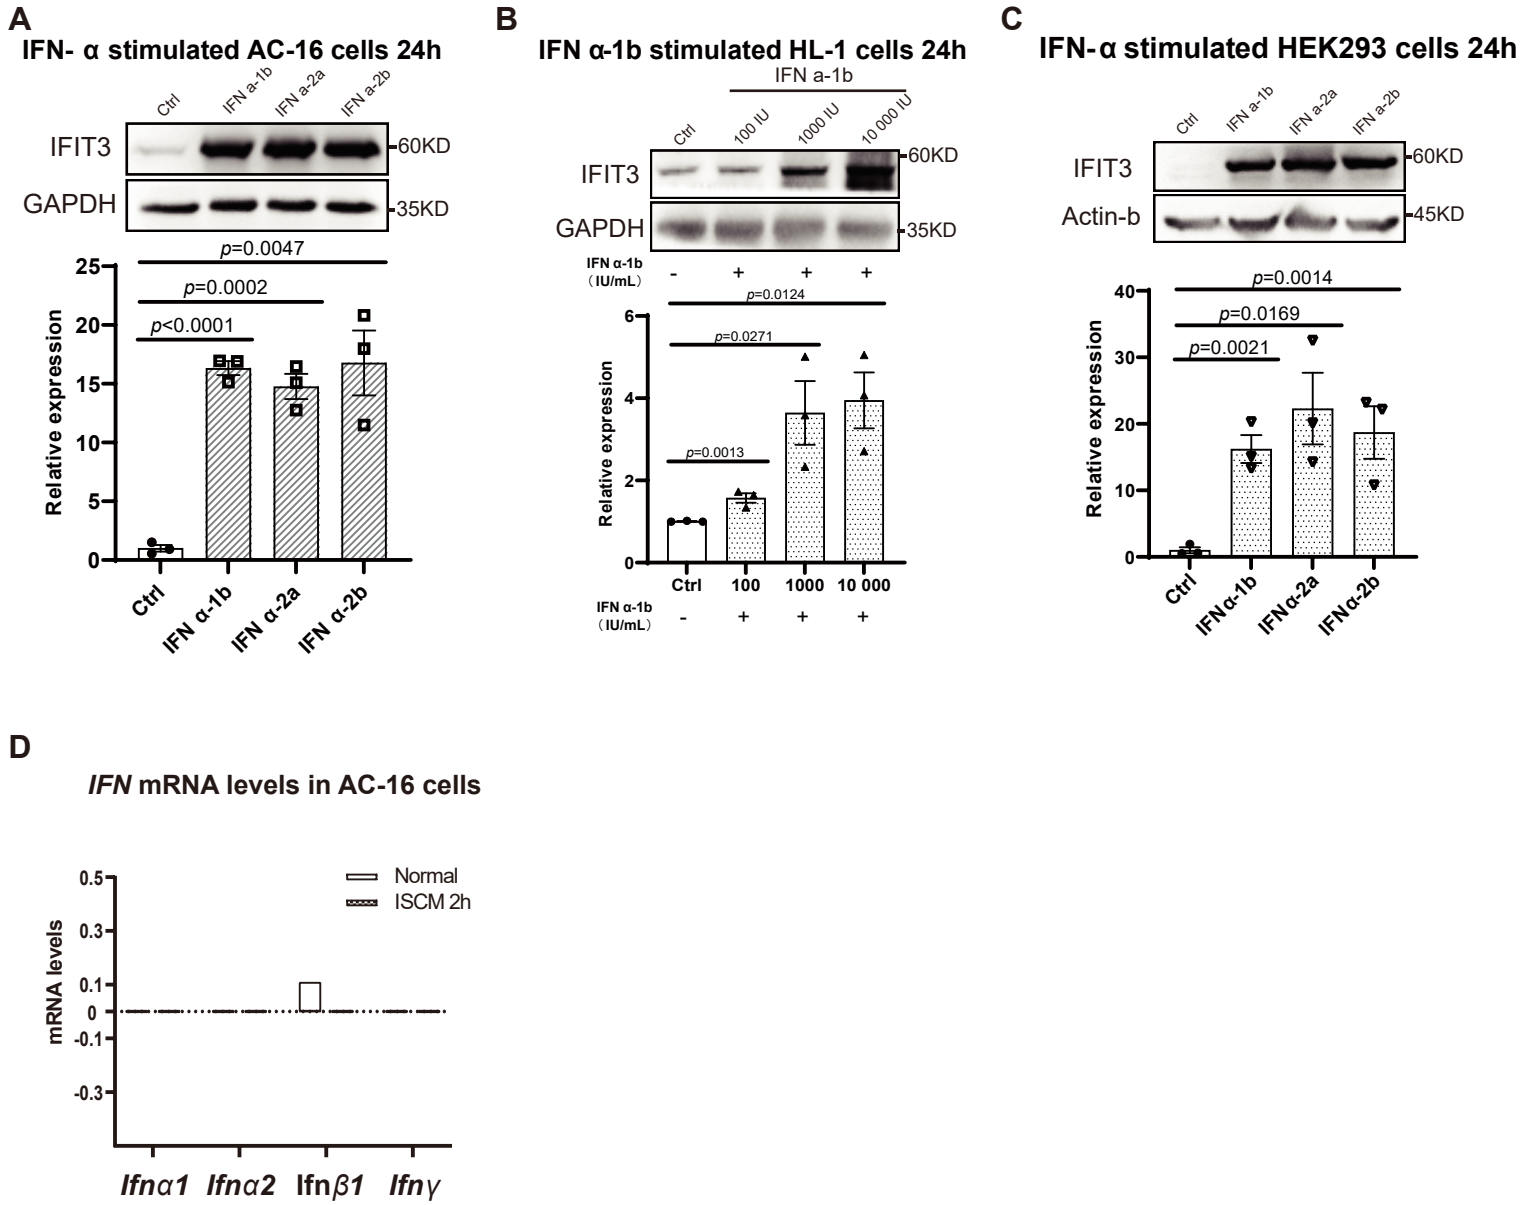

S Figure 6

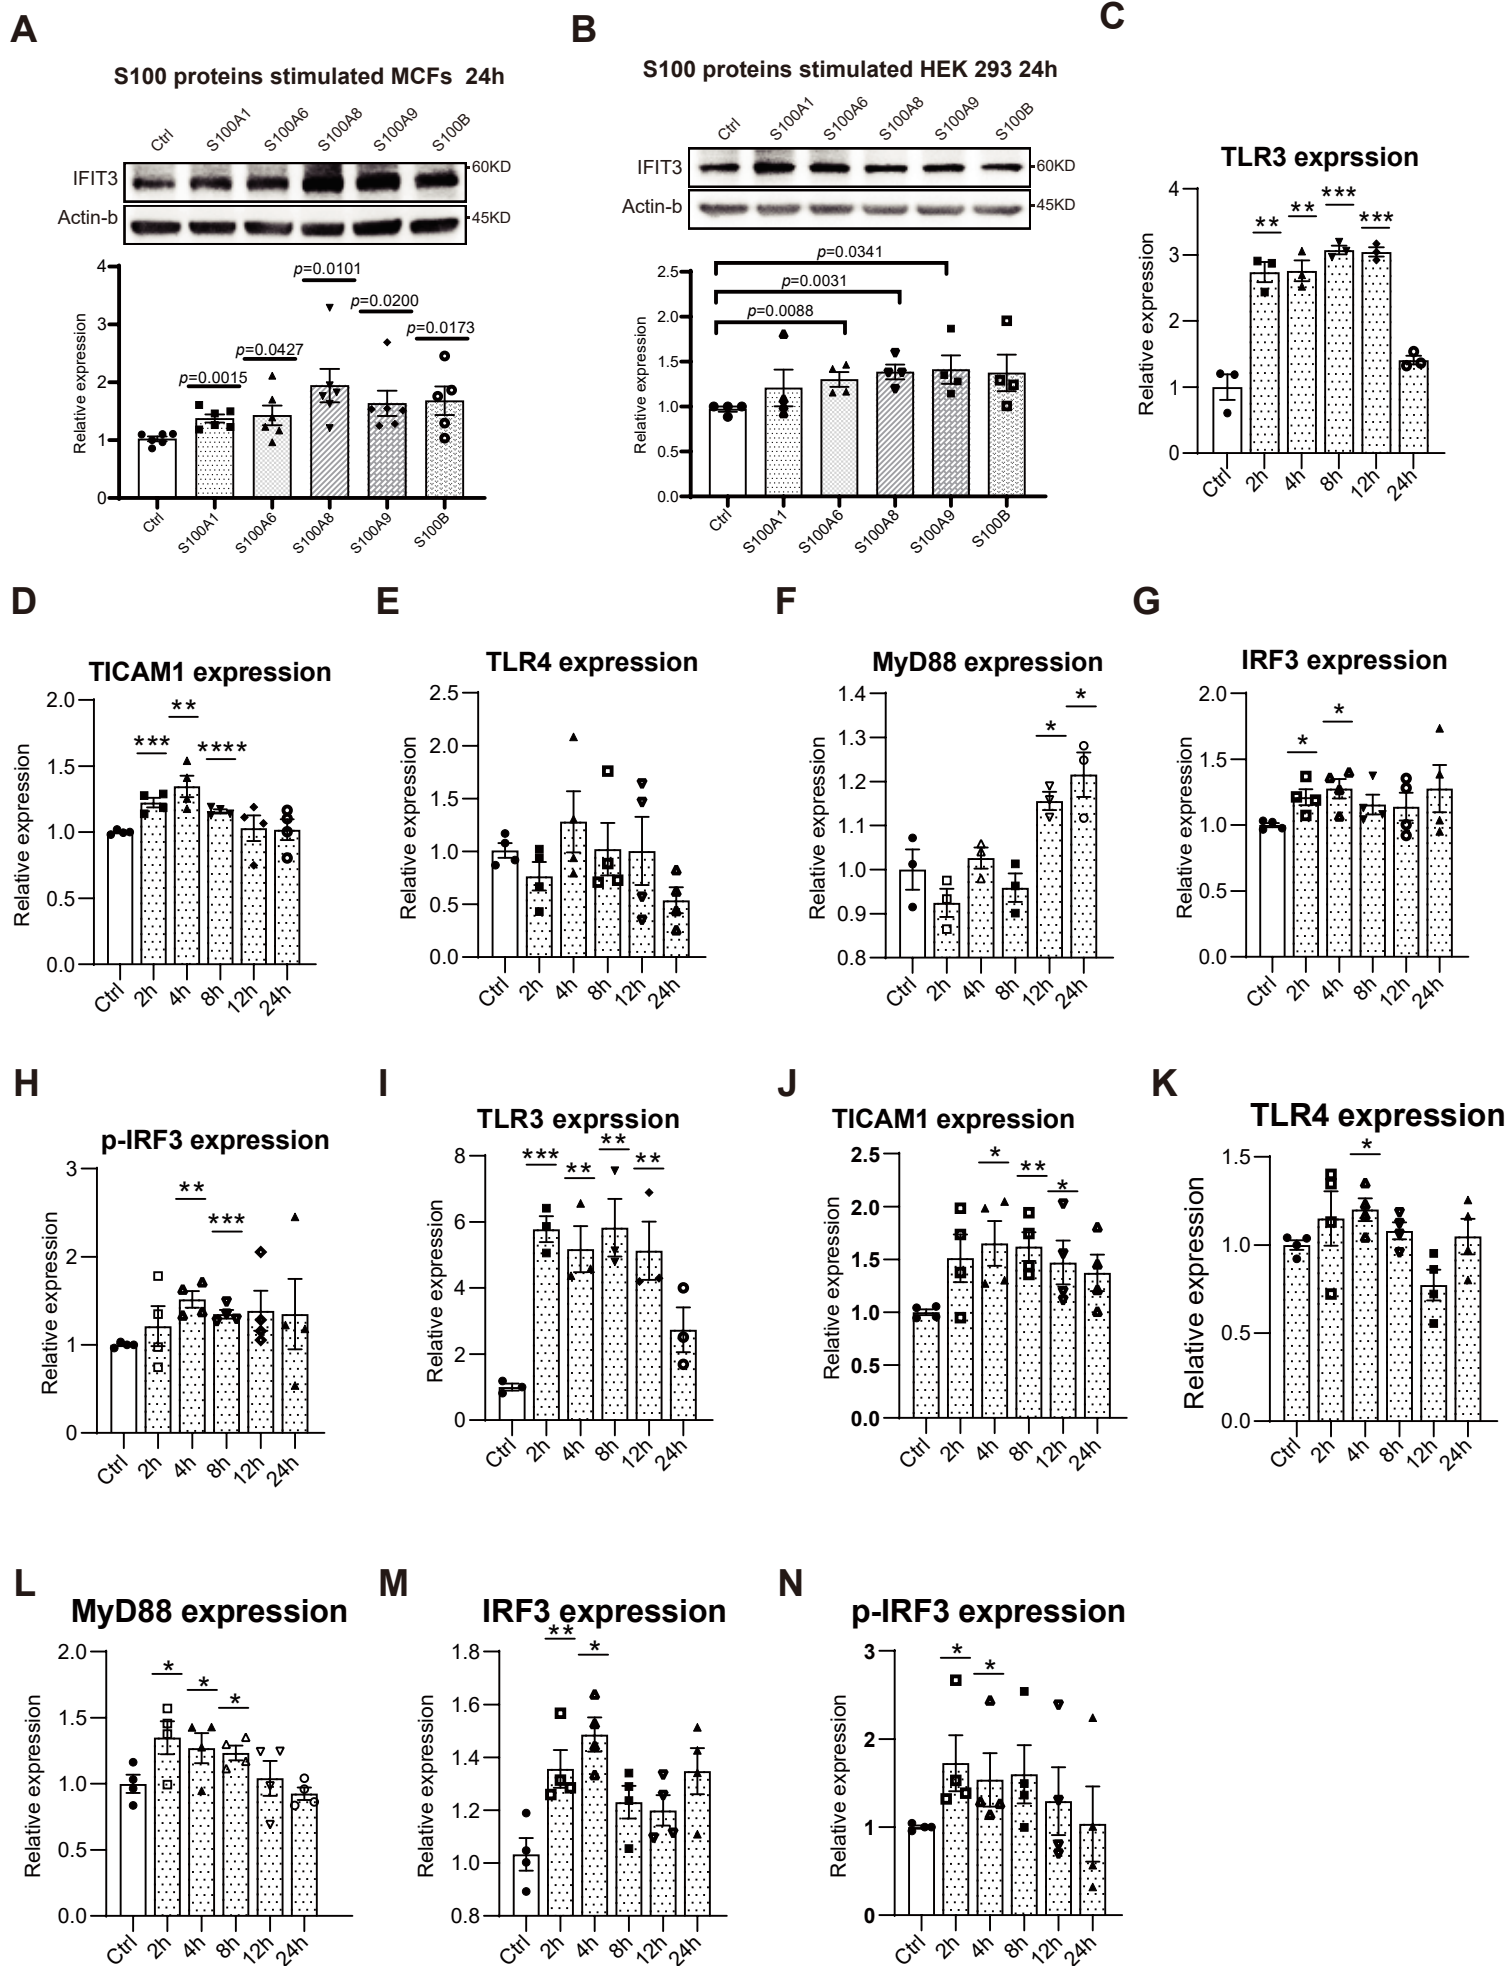

S Figure 7

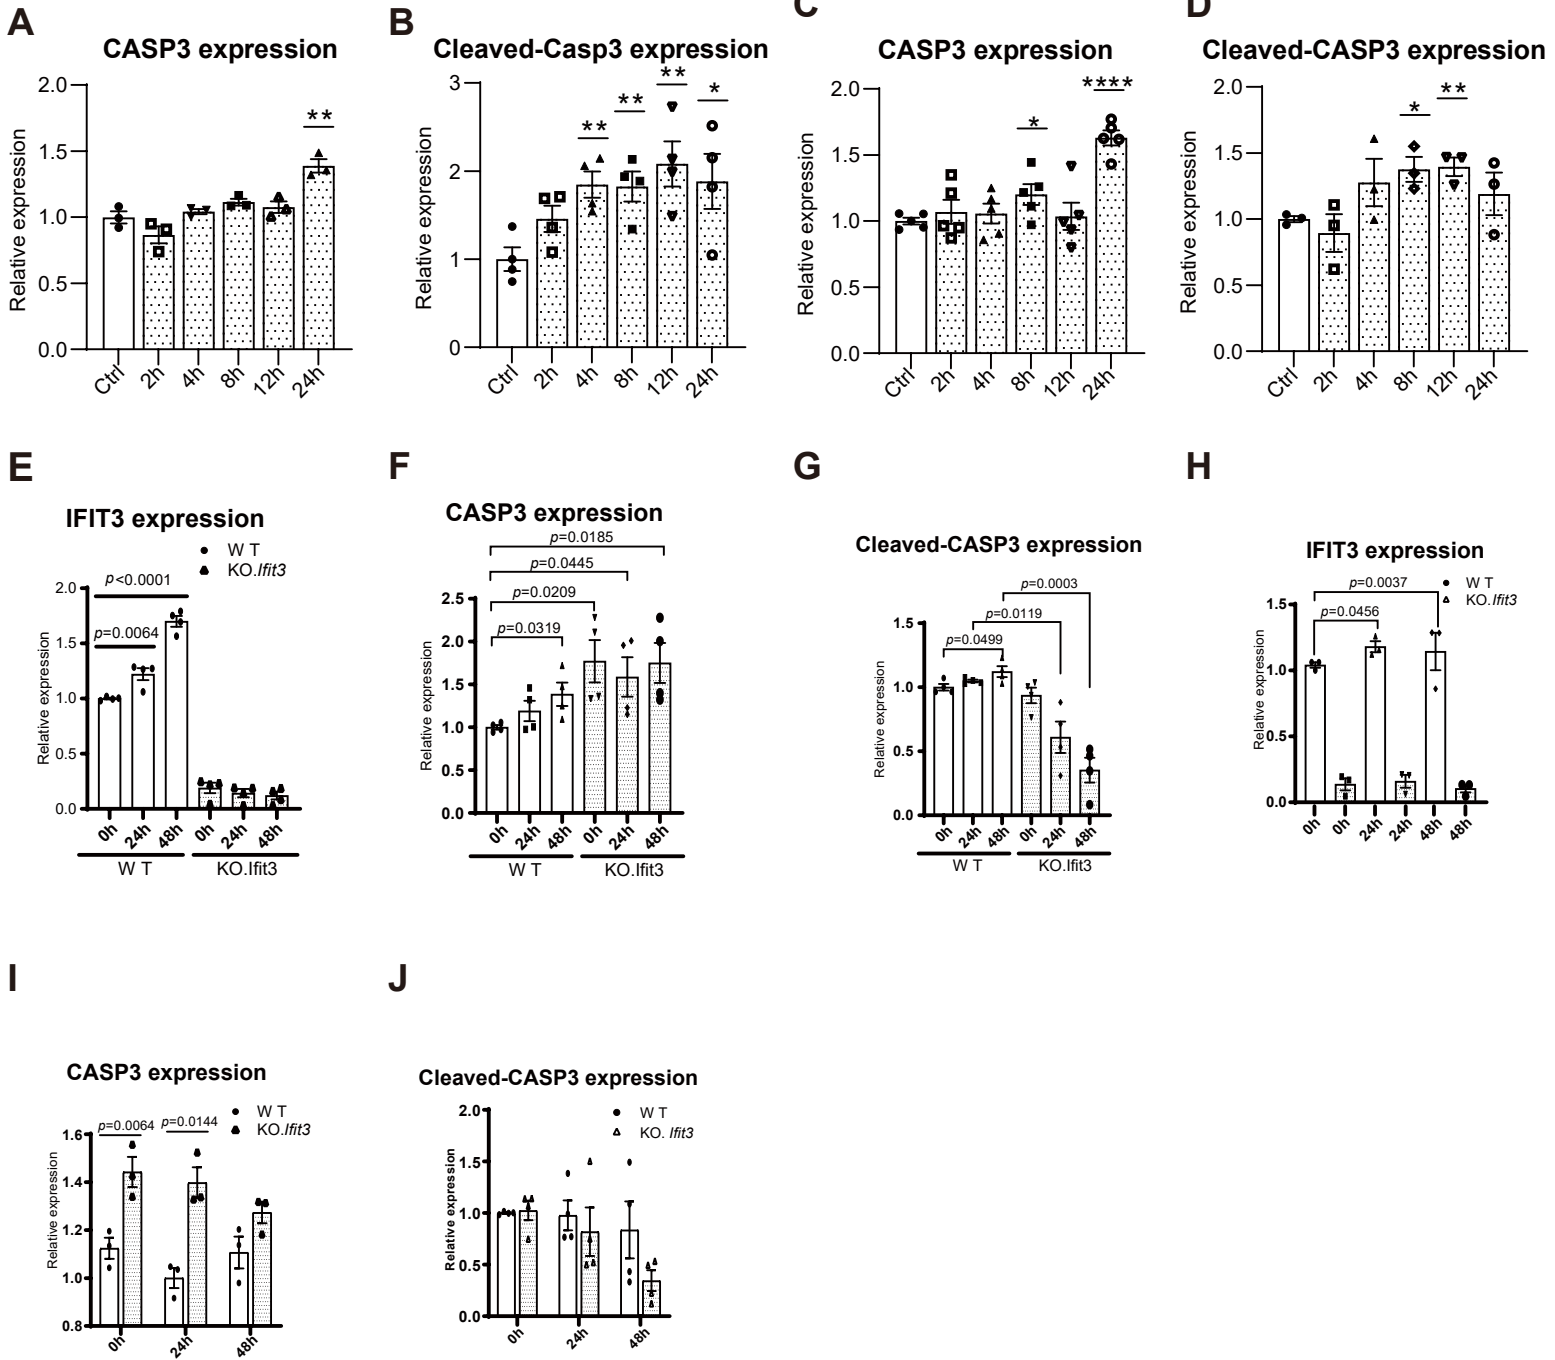

Supplement: Supplementary file 1 [file 6598c68bc0c72368b36cee52.pdf]
